# Supplementary material for: Integrative proteogenomic characterization of early esophageal cancer
Source: PubMed Central journal article supplement (PMC10039899; doi:10.1038/s41467-023-37440-w), 2023-03-25
Supplement: 41467_2023_37440_MOESM1_ESM.pdf [file 41467_2023_37440_MOESM1_ESM.pdf]

# Supplementary Fig. 1

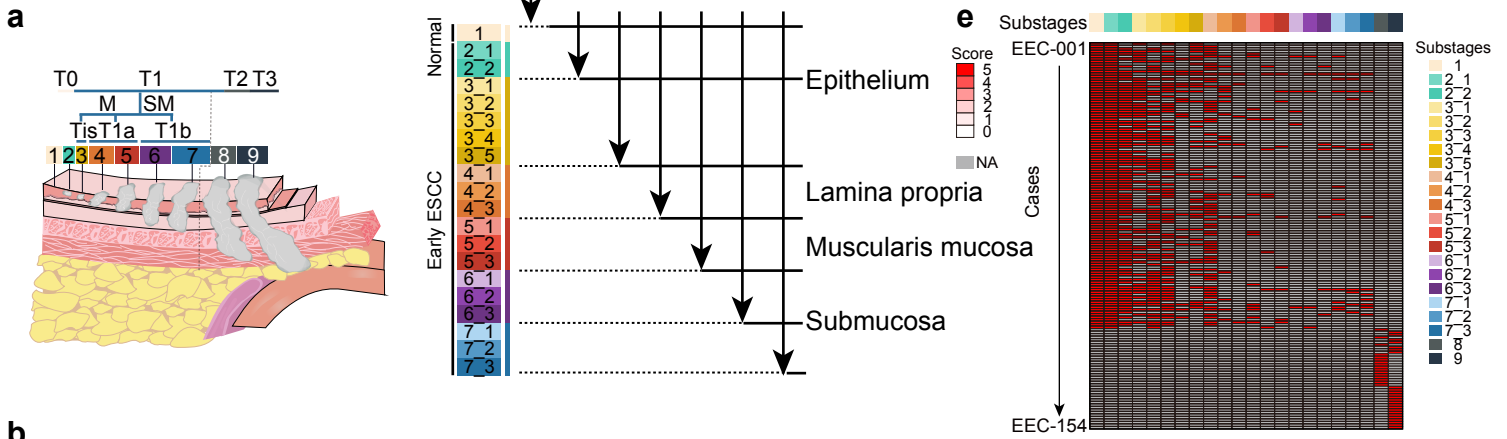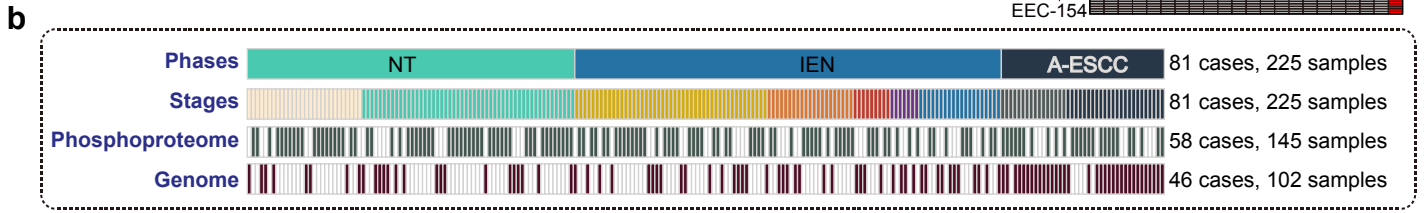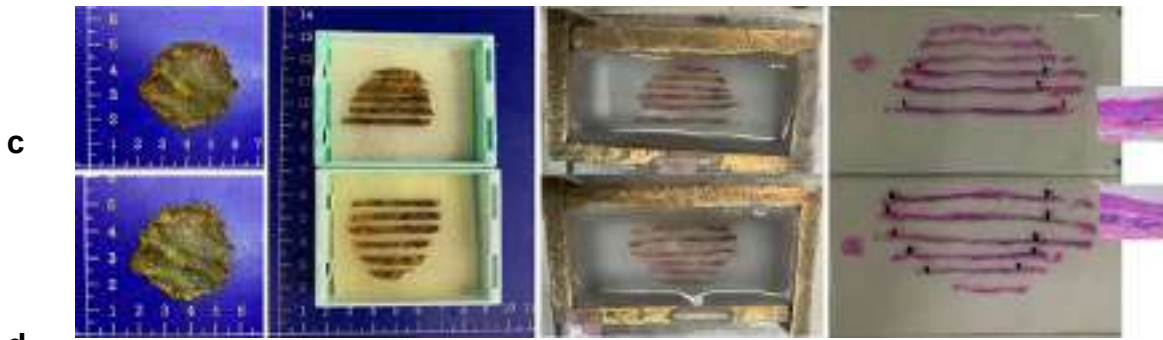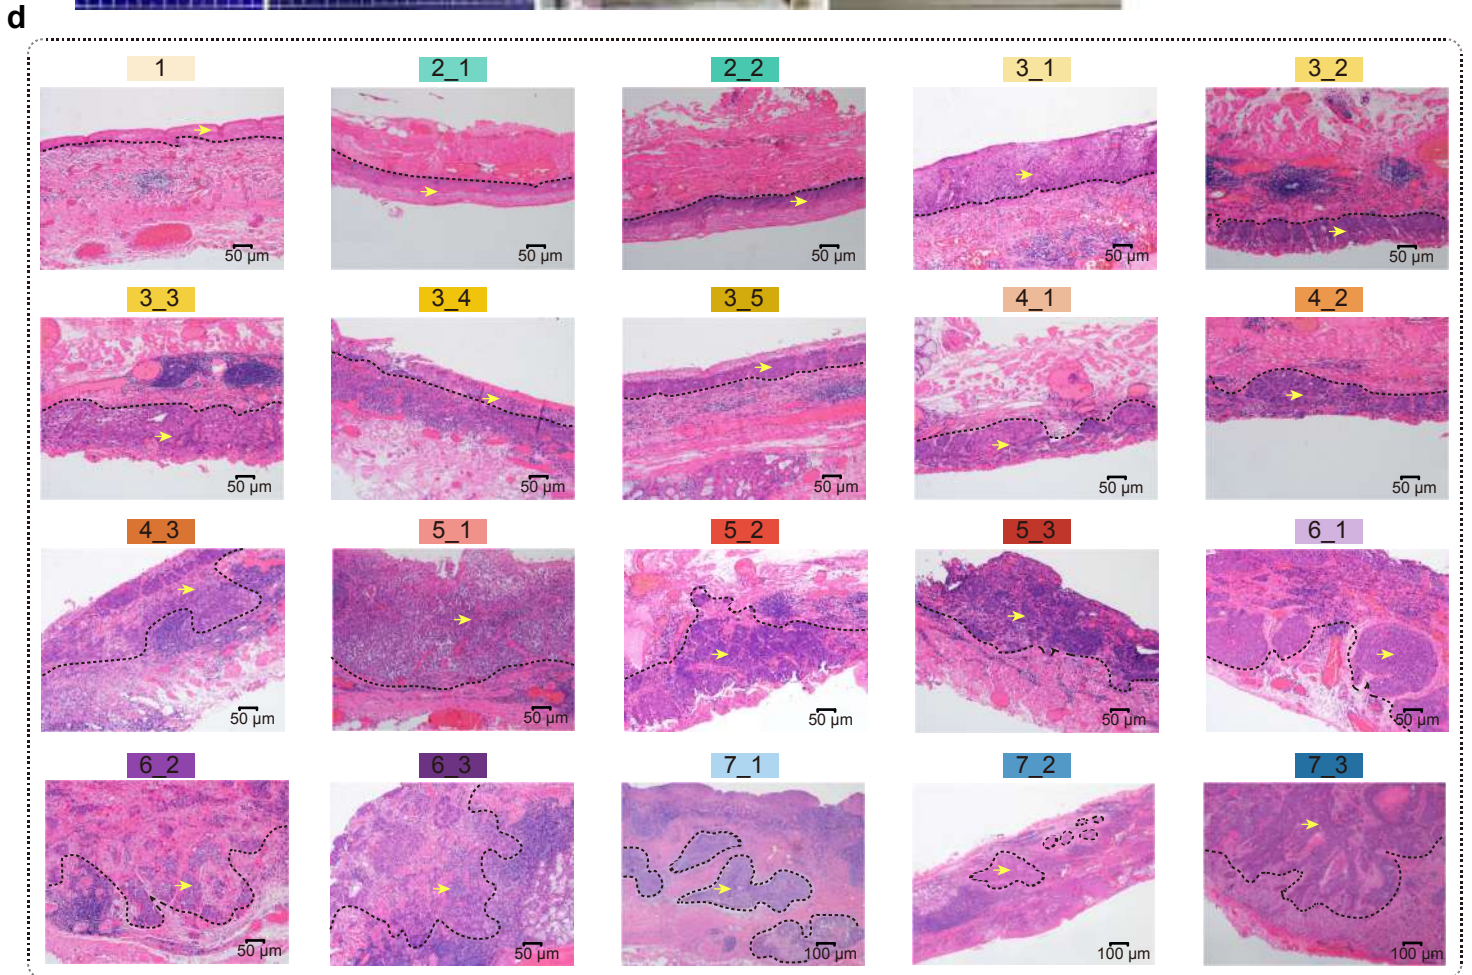

**Supplementary Fig. 1 H&E stained on early ESCCs.** (a) Invasion layer in ESCC progression. T0 – T1 indicated the early ESCC stages, ranging from substage 1 (normal tissue stage) to substage 7\_3 (submucosa stage). T2 – T3 represent the advanced ESCC stages, including stages 8 (T2 stage) and 9 (T3 stage). Diversity sign is marked the distinctive invasion layer on the right. (b) The links of phosphoproteome data to genome data. The square directs to a subset of patient samples used for phosphoproteome or for WES (n = 102). NT phase: non-tumor phase. IEN phase: intraepithelial neoplasia phase. A-ESCC phase: advanced-stage esophageal squamous cell carcinoma phase. (c) The procedure of dissection and embedding. (d) H&E staining analysis of different substages in early ESCC. (e) The normal epithelial/tumor cell purity of 786 samples in ESCC progression. Source data are provided as a Source data file.

# Supplementary Fig. 2

**a**

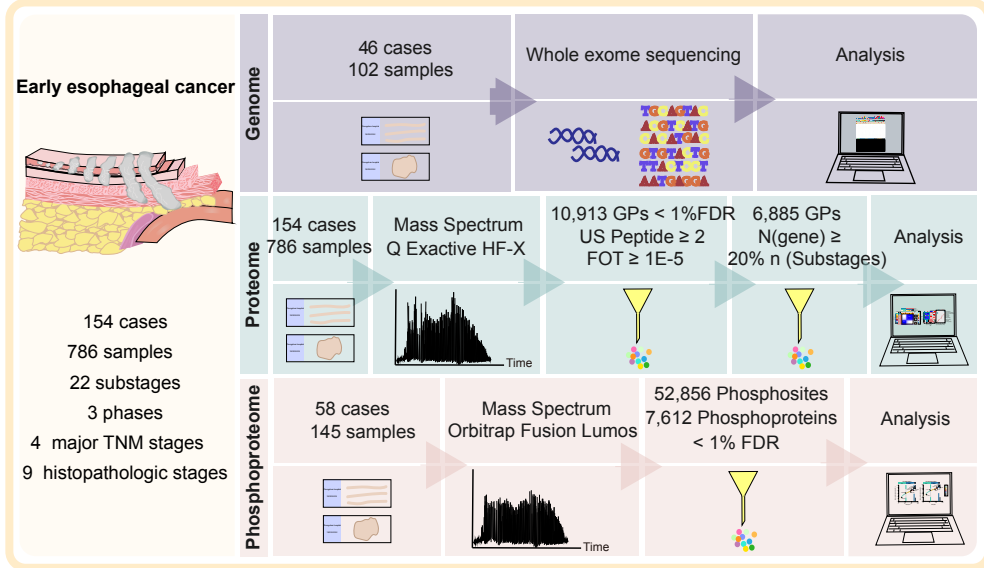

**b**

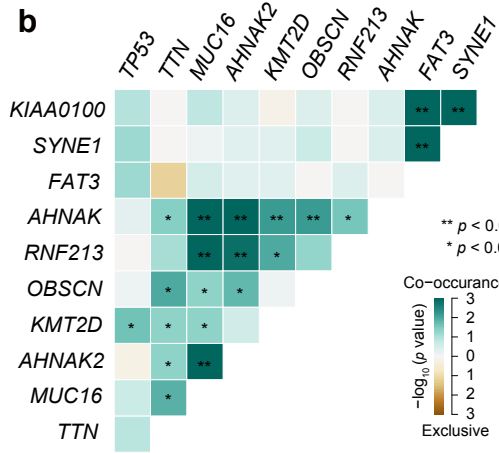

**c**

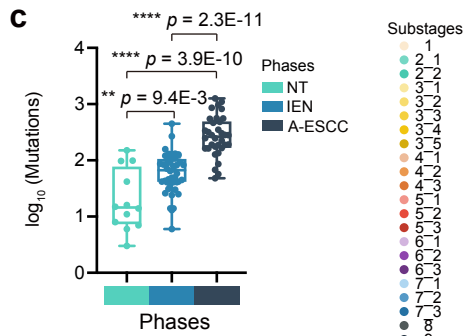

**d**

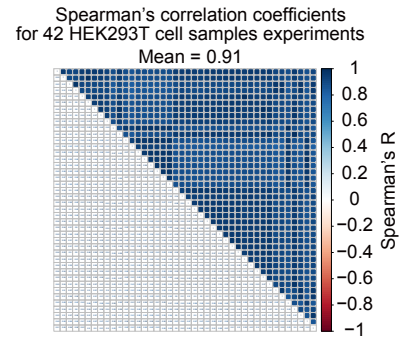

**e**

| Stage | Spearman's R (mean) |
|-------|---------------------|
| 1     | 0.8067              |
| 2     | 0.7974              |
| 3     | 0.7730              |
| 4     | 0.7656              |
| 5     | 0.7574              |
| 6     | 0.7623              |
| 7     | 0.7656              |
| 8     | 0.6498              |
| 9     | 0.6721              |

**f**

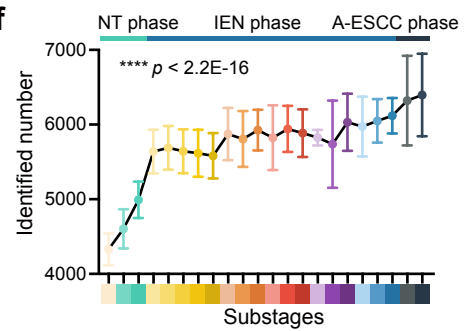

**g**

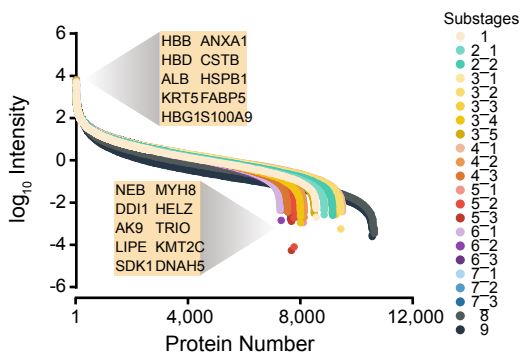

**h**

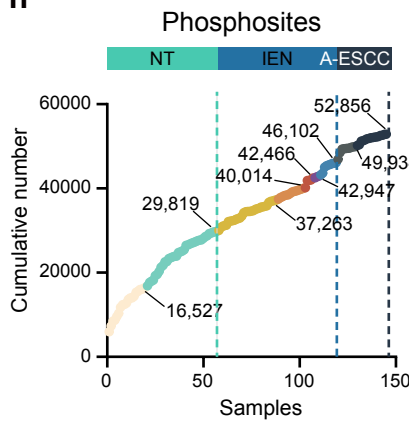

**i**

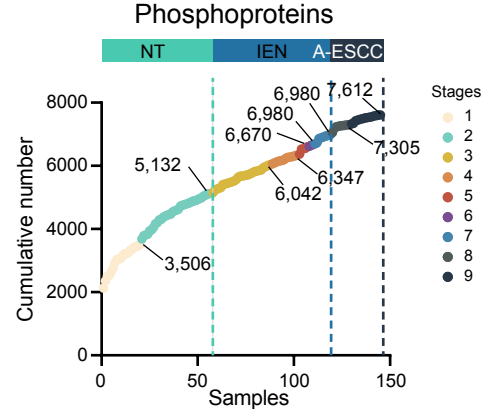

**j**

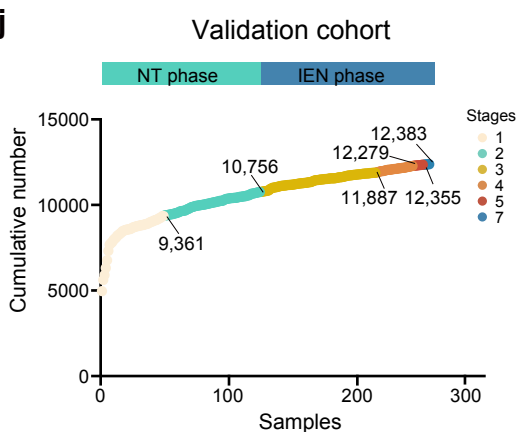

**k**

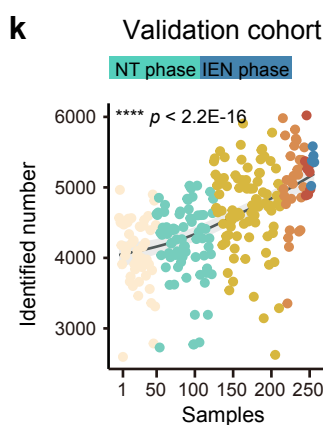

**l**

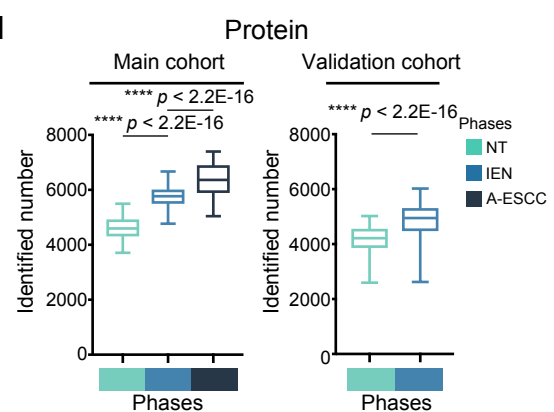

**Supplementary Fig. 2 A brief workflow of multi-omics analysis and overview of the proteomic profiles of early and progressive ESCC cohorts. (a)** The workflow of sampling, processing, and analysis of all ESCC samples at the multi-omics level. The 786 samples are collected from 154 ESCC patients, including those from the surgery samples (n = 40, T2 – T3) and biopsy samples after ESD (n = 746, T0–T1). **(b)** The exclusively co-mutations of the top 10 mutations in the genomics data (n = 102) of the Fudan cohort (two-sided Fisher’s exact test,  $p < 0.05$ ). **(c)** Boxplot showing the TMB in the NT, IEN, A-ESCC phases of ESCC (two-sided Wilcoxon signed-rank test). A total of 102 samples for WES are used in the analysis. \*\*  $p = 9.4E-3$  (NT & IEN), \*\*\*\*  $p = 3.9E-10$  (IEN & A-ESCC), \*\*\*\*  $p = 2.3E-11$  (NT & A-ESCC). **(d)** (Spearman’s) correlation analysis of 42 HEK293T cell samples as MS quality control to evaluate the robustness of label-free quantification (two-sided Spearman’s correlation test). **(e)** Table chart showing the (Spearman’s) correlation coefficients (mean) of stages in ESCC progression (n = 786, two-sided Spearman’s correlation test). **(f)** The number of protein identifications of 22 substages in ESCC progression (Kruskal-Wallis test, \*\*\*\*  $p < 2.2E-16$ , mean  $\pm$  SD). n (stage 1) = 114, n (stage 2) = 206, n (stage 3) = 259, n (stage 4) = 86, n (stage 5) = 32, n (stage 6) = 17, n (stage 7) = 32, n (stage 8) = 16, n (stage 9) = 24 biologically independent samples examined. **(g)** The dynamics of protein abundance identified in 22 substages. Proteins are quantified as normalized iBAQ value and transformed to  $\log_{10}$  Intensity. The highest- and lowest- abundance proteins are shown in the box. The cumulative number of the phosphosites **(h)** and phosphoproteins **(i)** of 145 samples in ESCC progression. **(j)** The cumulative number of the proteins of 256 samples (validation cohort) in ESCC progression. **(k)** The number of the identified proteins of 256 samples (validation cohort) in ESCC progression (Kruskal-Wallis test, \*\*\*\*  $p < 2.2E-16$ ). **(l)** Boxplots showing the number of the protein identifications in the phases during the carcinogenesis of ESCC in the main cohort (left, n = 786) and validation cohort (right, n = 256) (two-sided Wilcoxon rank-signed test). \*\*\*\*  $p < 2.2E-16$ , \*\*\*\*  $p < 2.2E-16$ , \*\*\*\*  $p < 2.2E-16$  from left to right. Boxplots show median (central line), upper and lower quartiles (box limits), 1.5 $\times$  interquartile range (whiskers) in panels **c, l**. \*\*\*\*  $p < 1.0E-4$ , \*\*\*  $p < 1.0E-3$ , \*\*  $p < 0.01$ , \*  $p < 0.05$ , ns.  $> 0.05$ . Source data are provided as a Source data file.

# Supplementary Fig. 3

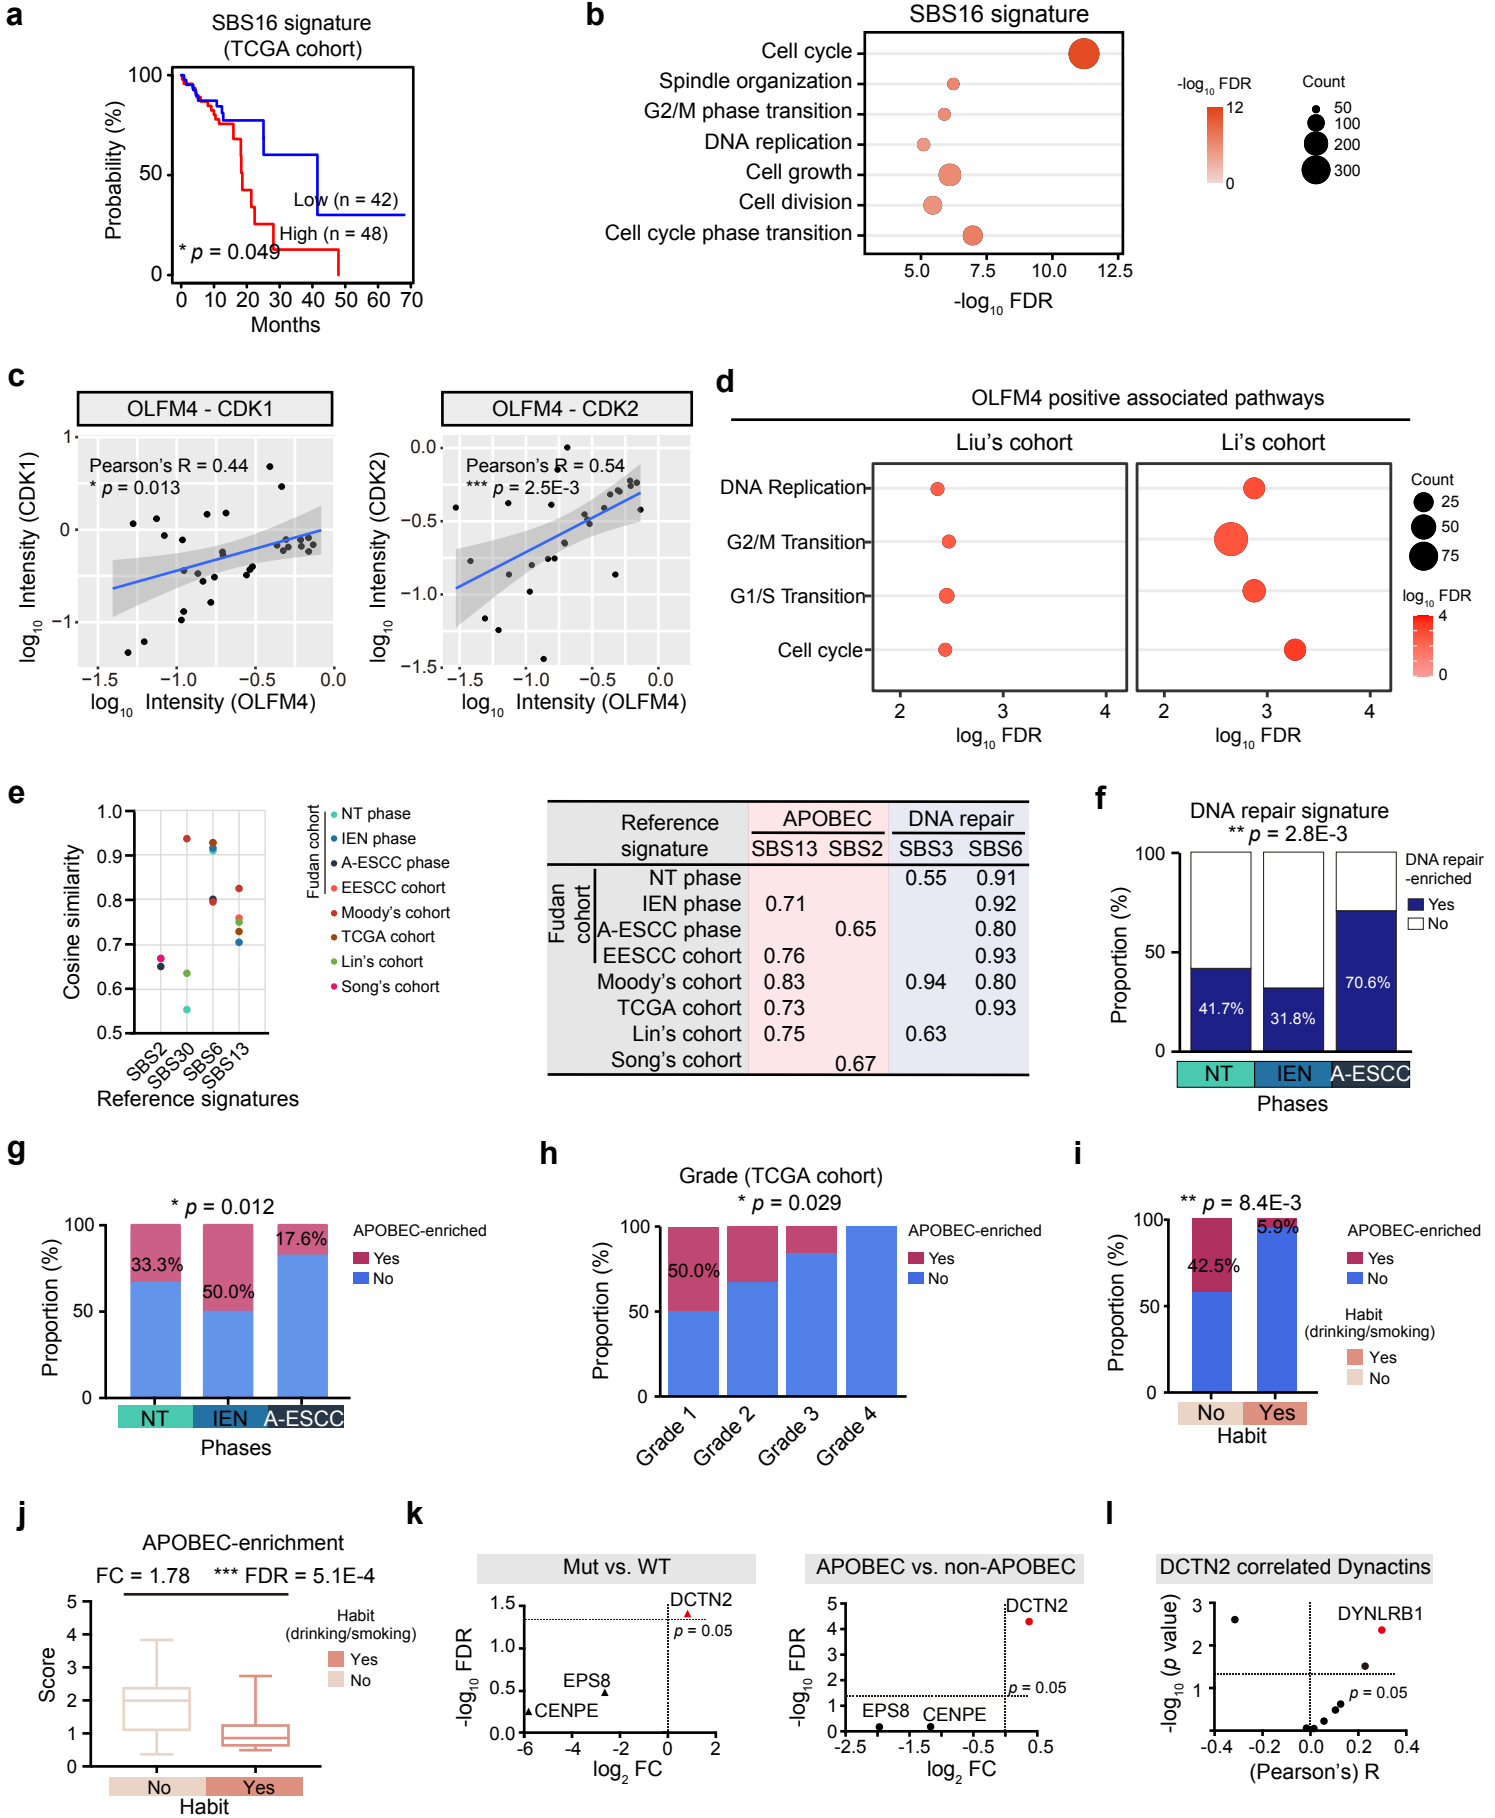

**Supplementary Fig. 3 The risk factor associated signature in ESCC progression.** (a) Survival analysis of patients with high SBS16 signature score (two-sided log-rank test). The survival information is referred from the TCGA ESCC cohort. (b) The dominant pathways in SBS16 signature enrichment group. (c) Scatter plot showing the (Pearson's) correlation between OLFM4 and CDK1 (left), and OLFM4 and CDK2 (right) (two-sided Pearson's correlation test, mean  $\pm$  SD). (d) The represented enrichment pathways with OLFM4 positively associated proteins in other ESCC cohorts. (e) The cosine similarity (left) and dominant signatures (right) of the Fudan cohort and other ESCC cohorts. (f) Histogram showing the proportion of DNA repair signature in the three phases of ESCC (two-sided Fisher's exact test). (g) Histogram showing the proportion of APOBEC signature in ESCC progression (two-sided Fisher's exact test). (h) Histogram showing the proportion of APOBEC signature in the four grades in ESCC progression of TCGA cohort (two-sided Fisher's exact test). (i) Histogram showing the proportion of APOBEC signature in ESCC patients with different habits (drinking/smoking) (two-sided Fisher's exact test). (j) Boxplot showing higher APOBEC enrichment score in non-smoking/drinking ESCC patients (two-sided Wilcoxon signed-rank test). Boxplots show median (central line), upper and lower quartiles (box limits), 1.5 $\times$  interquartile range (whiskers). n (APOBEC enriched) = 32, n (APOBEC non-enriched) = 58 biologically independent samples examined. (k) Volcano analysis showing the impacts of *DCTN2/EP88/CENPE* mutations (left) and APOBEC signature (right) on the protein-levels of *DCTN2/EP88/CENPE* (two-sided Wilcoxon signed-rank test). (l) Volcano plot depicting the (Pearson's) correlation between *DCTN2* and the dynactin families' proteins (two-sided Pearson's correlation test). \*\*\*\*  $p < 1.0E-4$ , \*\*\*  $p < 1.0E-3$ , \*\*  $p < 0.01$ , \*  $p < 0.05$ , ns.  $> 0.05$ . Source data are provided as a Source data file.



# Supplementary Fig. 4

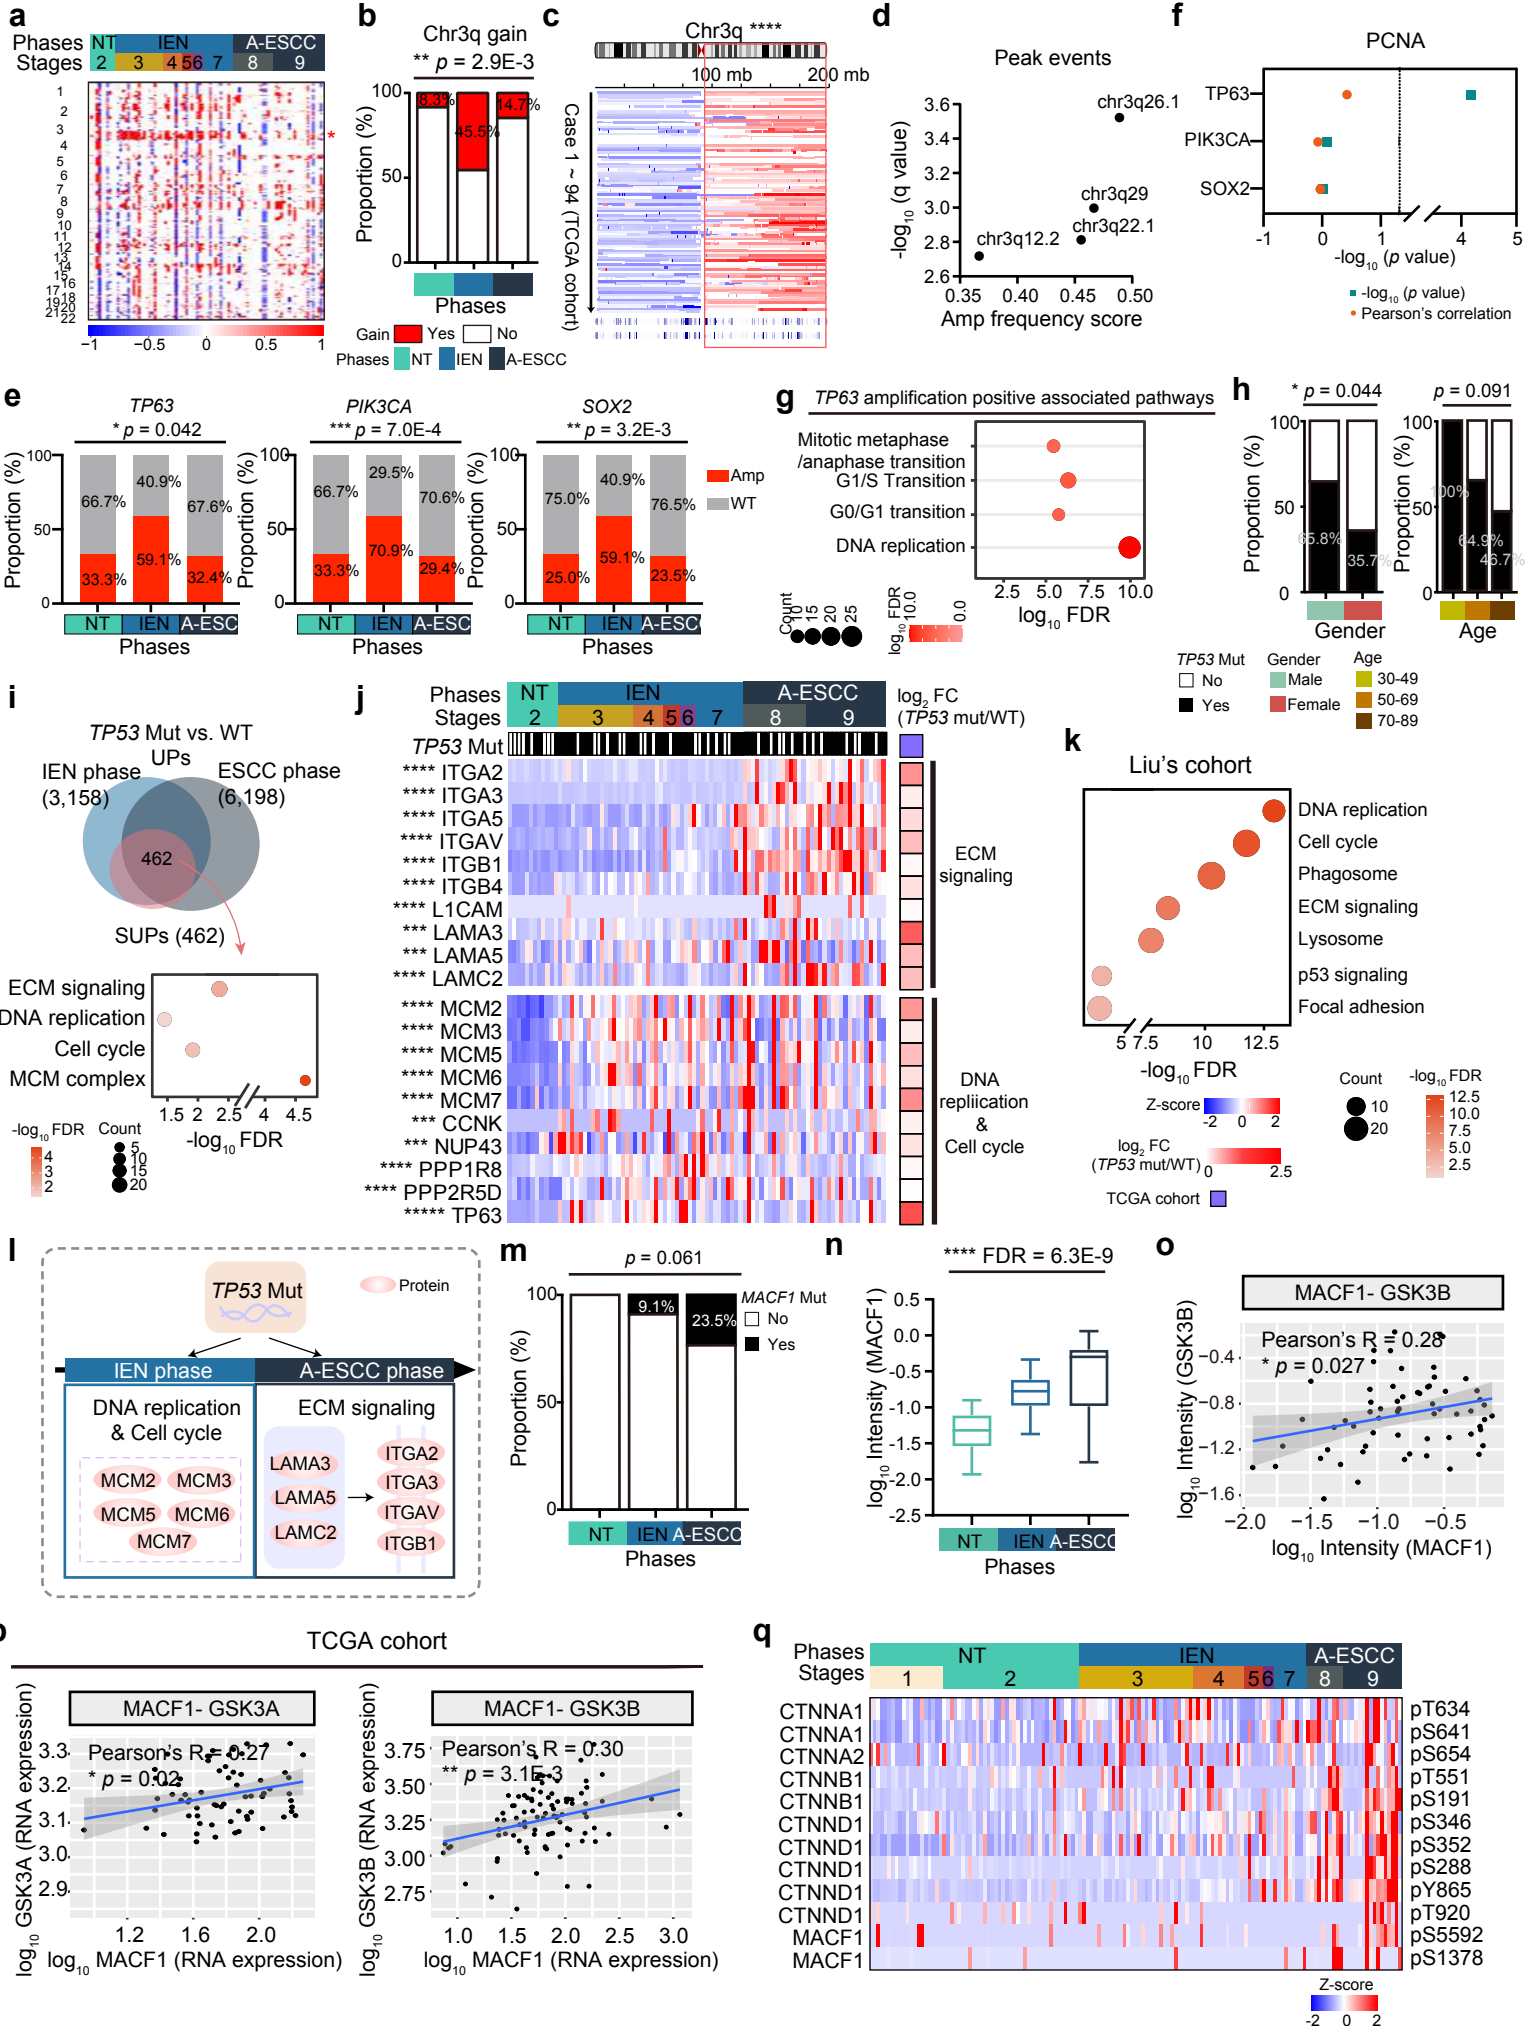

**Supplementary Fig. 4 Integrative analyses of genomics, proteomics, and phosphoproteomics data in ESCC progression.** (a) Profiling of absolute copy number alterations observed in the Fudan cohort. The square directs to a subset of patient samples used for WES (n = 102). (b) Histogram showing the proportion of the chr3q gain in the three phases of 102 samples in ESCC progression (two-sided Fisher's exact test). (c) Profiling of absolute copy number alterations showing the roles of chr3q gain in the TCGA ESCC cohort (two-sided Fisher's exact test, \*\*\*\* $p < 2.2E-16$ ). (d) The significant peaks events at the chr3q gain in ESCC progression. A total of 102 samples for WES are used in the analysis. (e) Histograms showing the proportion of the amplifications of *TP63/PIK3CA/SOX2* in the three phases of 102 samples in ESCC progression (two-sided Fisher's exact test). (f) The (Pearson's) correlation between *TP63/PIK3CA/SOX2* and PCNA at the protein level (two-sided Pearson's correlation test). (g) The represented biological pathways associated with *TP63* amplification. (h) Histograms showing the proportion of *TP53* mutation in gender (left) and ages (right) in ESCC progression (two-sided Fisher's exact test). (i) The number of the overlapped proteins (top) enhanced by *TP53* mutation and the representative pathways (bottom) (two-sided Wilcoxon rank-signed test). Ups: the up-regulated proteins. (j) Heatmap showing the proteins and the associated biological pathways elevated by *TP53* mutation in ESCC progression (Kruskal-Wallis test, BH-adjusted \* $p < 0.05$ ). The square directs to a subset of patient samples used for WES (n = 102). The fold change (*TP53* Mut vs. WT ratio) of the TCGA cohort shown in the right. (k) The represented pathways in the tumor tissues compared to the paired non-cancerous adjacent tissues (NATs). (l) A brief summary of the impacts of *TP53* mutation in ESCC progression. (m) Histogram showing the proportion of *MACF1* mutation in three phases in ESCC progression (n = 102 for WES) (two-sided Fisher's exact test). (n) Boxplot depicting the expression of *MACF1* in ESCC progression at the protein level (Kruskal-Wallis test). Boxplot shows median (central line), upper and lower quartiles (box limits), 1.5× interquartile range (whiskers). The overlapped samples (n = 90) for proteomic profiling and WES were used in the analysis, in which normal tissues were not included. n (NT) = 12, n (IEN) = 44, n (A-ESCC) = 34 biologically independent samples examined. (o) Scatterplot showing the relationship between  $\log_{10}$  GSK3B and  $\log_{10}$  *MACF1* expression (n = 102 for WES) at the protein level (two-sided Pearson's correlation test, mean  $\pm$  SD). (p) Scatterplots showing the relationship between  $\log_{10}$  GSK3A (left)/GSK3B (right) and  $\log_2$  *MACF1* expression at the RNA level in TCGA ESCC cohort (two-sided Pearson's correlation test, mean  $\pm$  SD). (q) Heatmap showing the impacts of



*MACF1* mutation on the expression of Wnt signaling related phosphoproteins in ESCC progression. The square directed to a subset of patient samples used for phosphoproteome. A total of 145 samples for phosphoproteomic profiling are used in the analysis. \*\*\*\*  $p < 1.0E-4$ , \*\*\*  $p < 1.0E-3$ , \*\*  $p < 0.01$ , \*  $p < 0.05$ , ns.  $> 0.05$ . Source data are provided as a Source data file.

# Supplementary Fig. 5

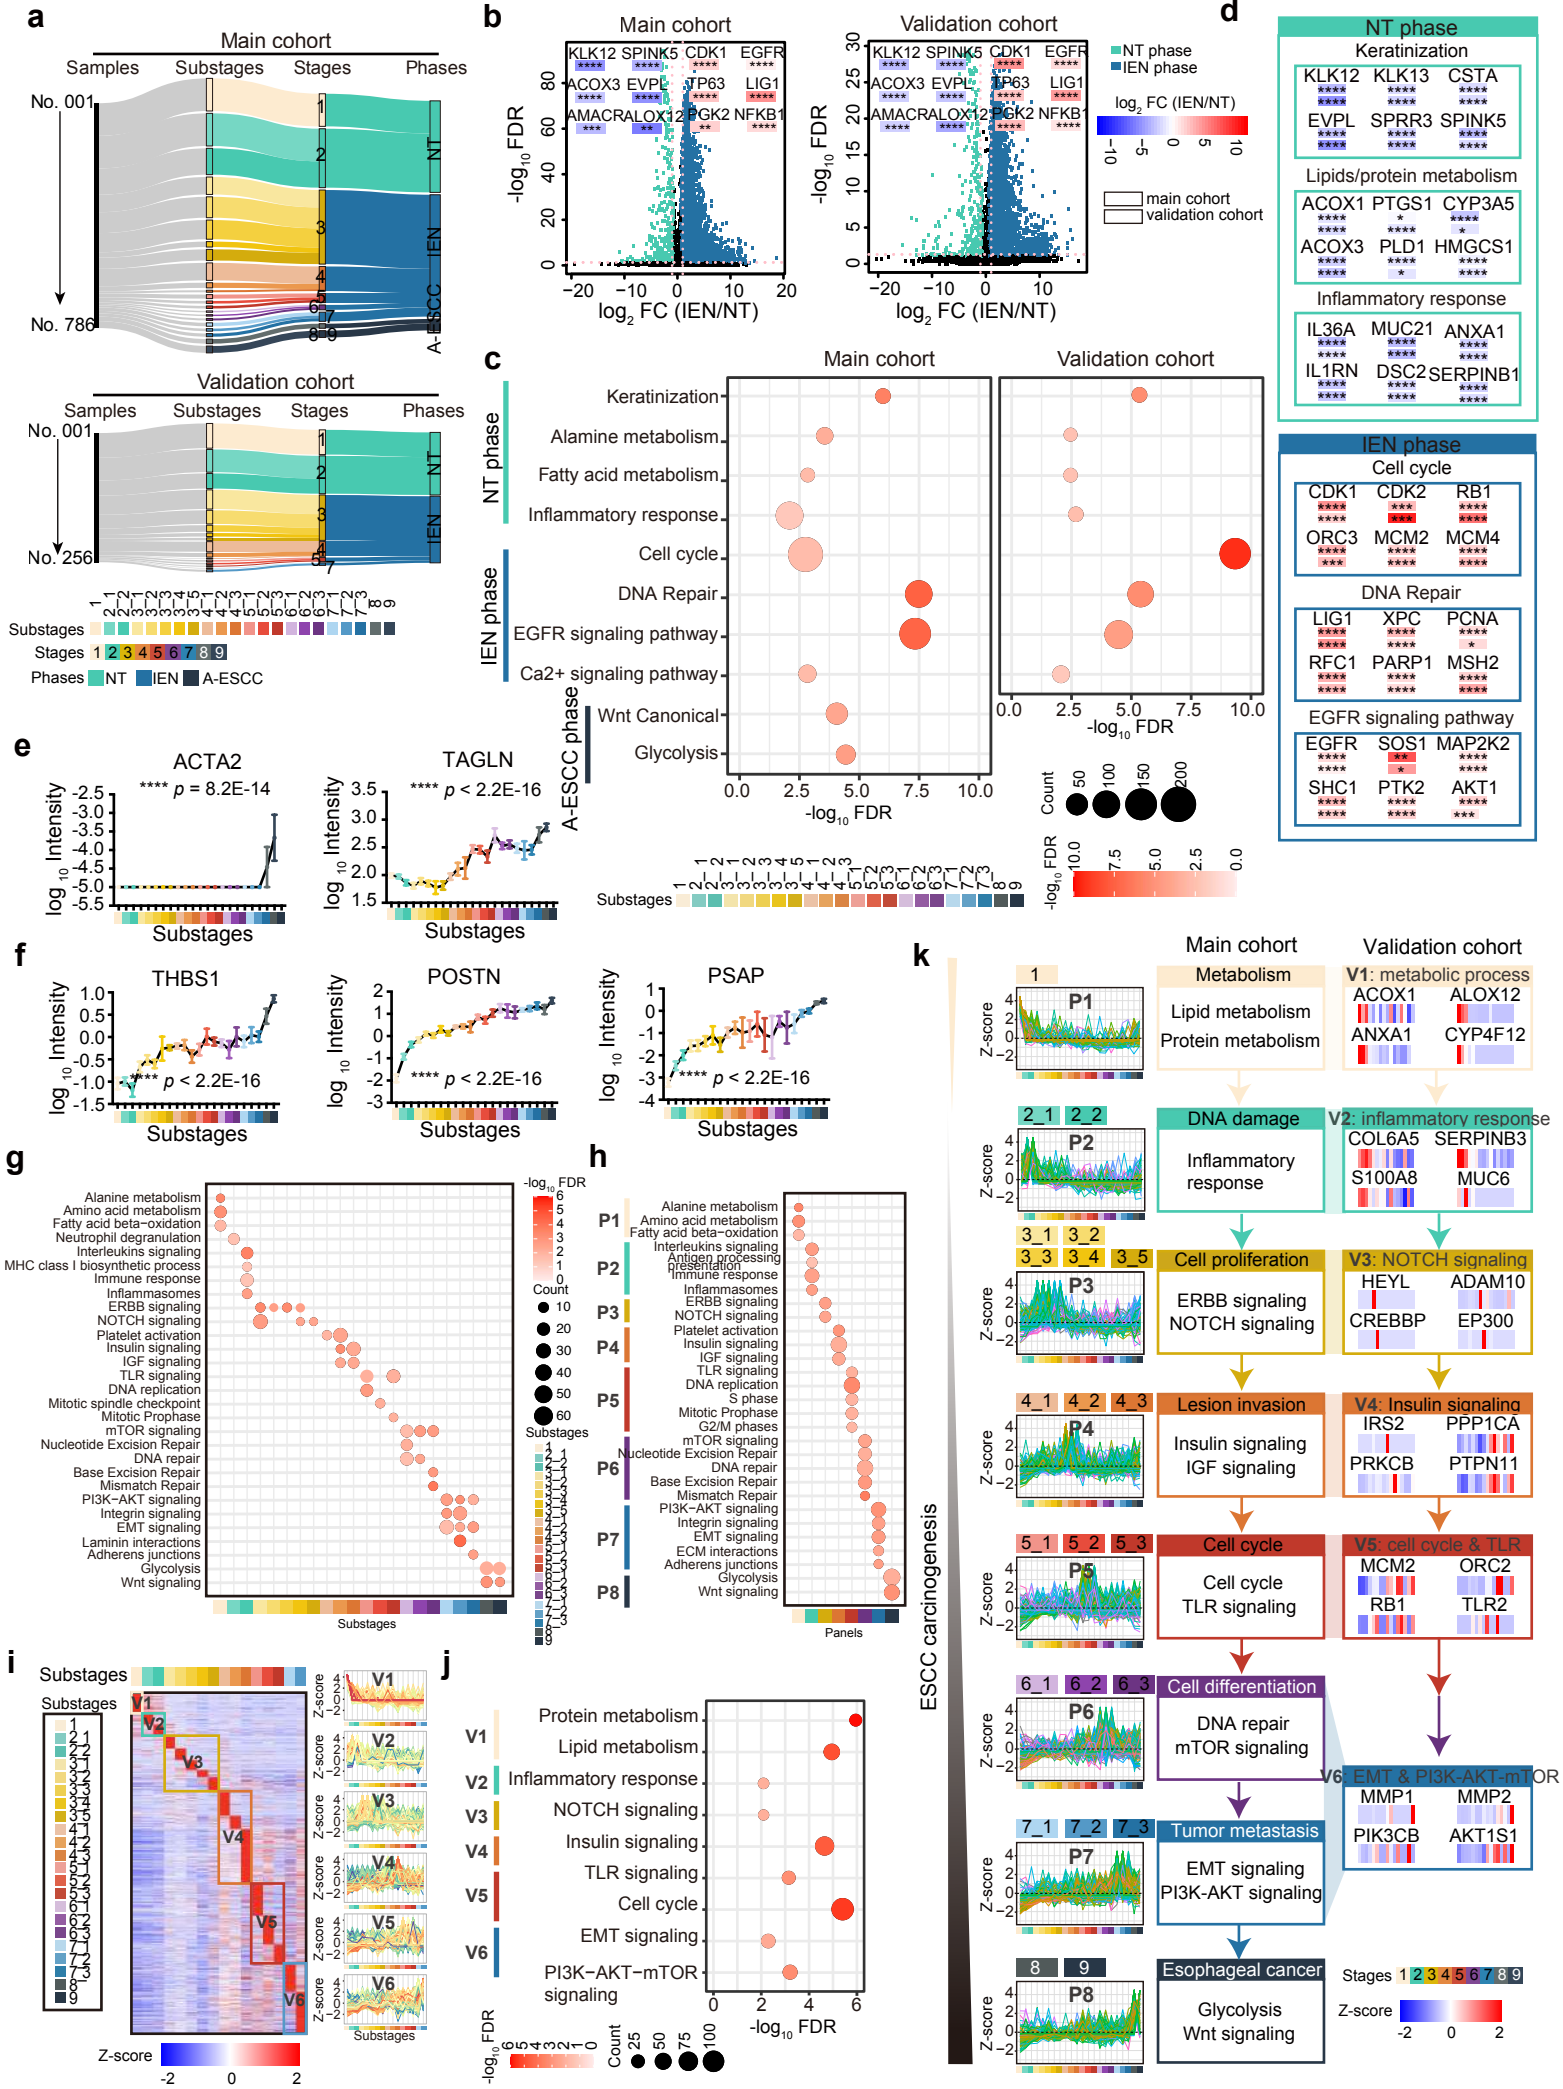

**Supplementary Fig. 5 The Immune-based panels and dynamic driver pathway waves of 8 panels in ESCC progression.** (a) Sankey diagram analysis of 786 and 256 samples in the main cohort (top) and validation cohort (bottom), respectively. (b) Volcano plot depicting the DEPs in the main cohort (left) and validation cohort (right) (two-sided Wilcoxon rank-signed test, \*\*\*\*  $p < 1.0E-4$ ). (c) The represented biological pathways of the phases in the main cohort (left,  $n = 786$ ) and validation cohort (right,  $n = 256$ ) (two-sided Wilcoxon rank-signed test). Biological pathways are analyzed from the Reactome database. (d) The represented pathways and associated proteins in the NT phase (top) and IEN phase (bottom) in the main cohort ( $n = 786$ ) and validation cohort ( $n = 256$ ) (two-sided Wilcoxon rank-signed test, \*  $p < 0.05$ ). Column showing the expression of ESCC biomarkers from other ESCC studies (e) (Yazdian-Robati et al.) and (f) (Pawar et al.) in ESCC progression (Kruskal-Wallis test, mean  $\pm$  SEM, \*\*\*\*  $p < 2.2E-16$ ). Twenty-two substages and  $\log_{10}$  Intensity were indicated on x and y axis, respectively.  $n$  (stage 1) = 114,  $n$  (stage 2) = 206,  $n$  (stage 3) = 259,  $n$  (stage 4) = 86,  $n$  (stage 5) = 32,  $n$  (stage 6) = 17,  $n$  (stage 7) = 32,  $n$  (stage 8) = 16,  $n$  (stage 9) = 24 biologically independent samples examined. (g) The represented pathways of 22 substages in ESCC progression. (h) The dominant pathways of 8 panels in ESCC progression. A total of 786 samples for proteomic profiling were used in the analysis. (i) Substage-based supervised clustering (left) and K-means (right) analysis of 6 proteomic patterns in the validation cohort ( $n = 256$ ). (j) The represented biological pathways of 6 proteomic patterns in the validation cohort ( $n = 256$ ). (k) A carcinogenesis path during ESCC progression in the main cohort (left) and validation cohort (right) The results of the k-means analysis were shown. \*\*\*\*  $p < 1.0E-4$ , \*\*\*  $p < 1.0E-3$ , \*\*  $p < 0.01$ , \*  $p < 0.05$ , ns.  $> 0.05$ . Source data are provided as a Source data file.

# Supplementary Fig. 6

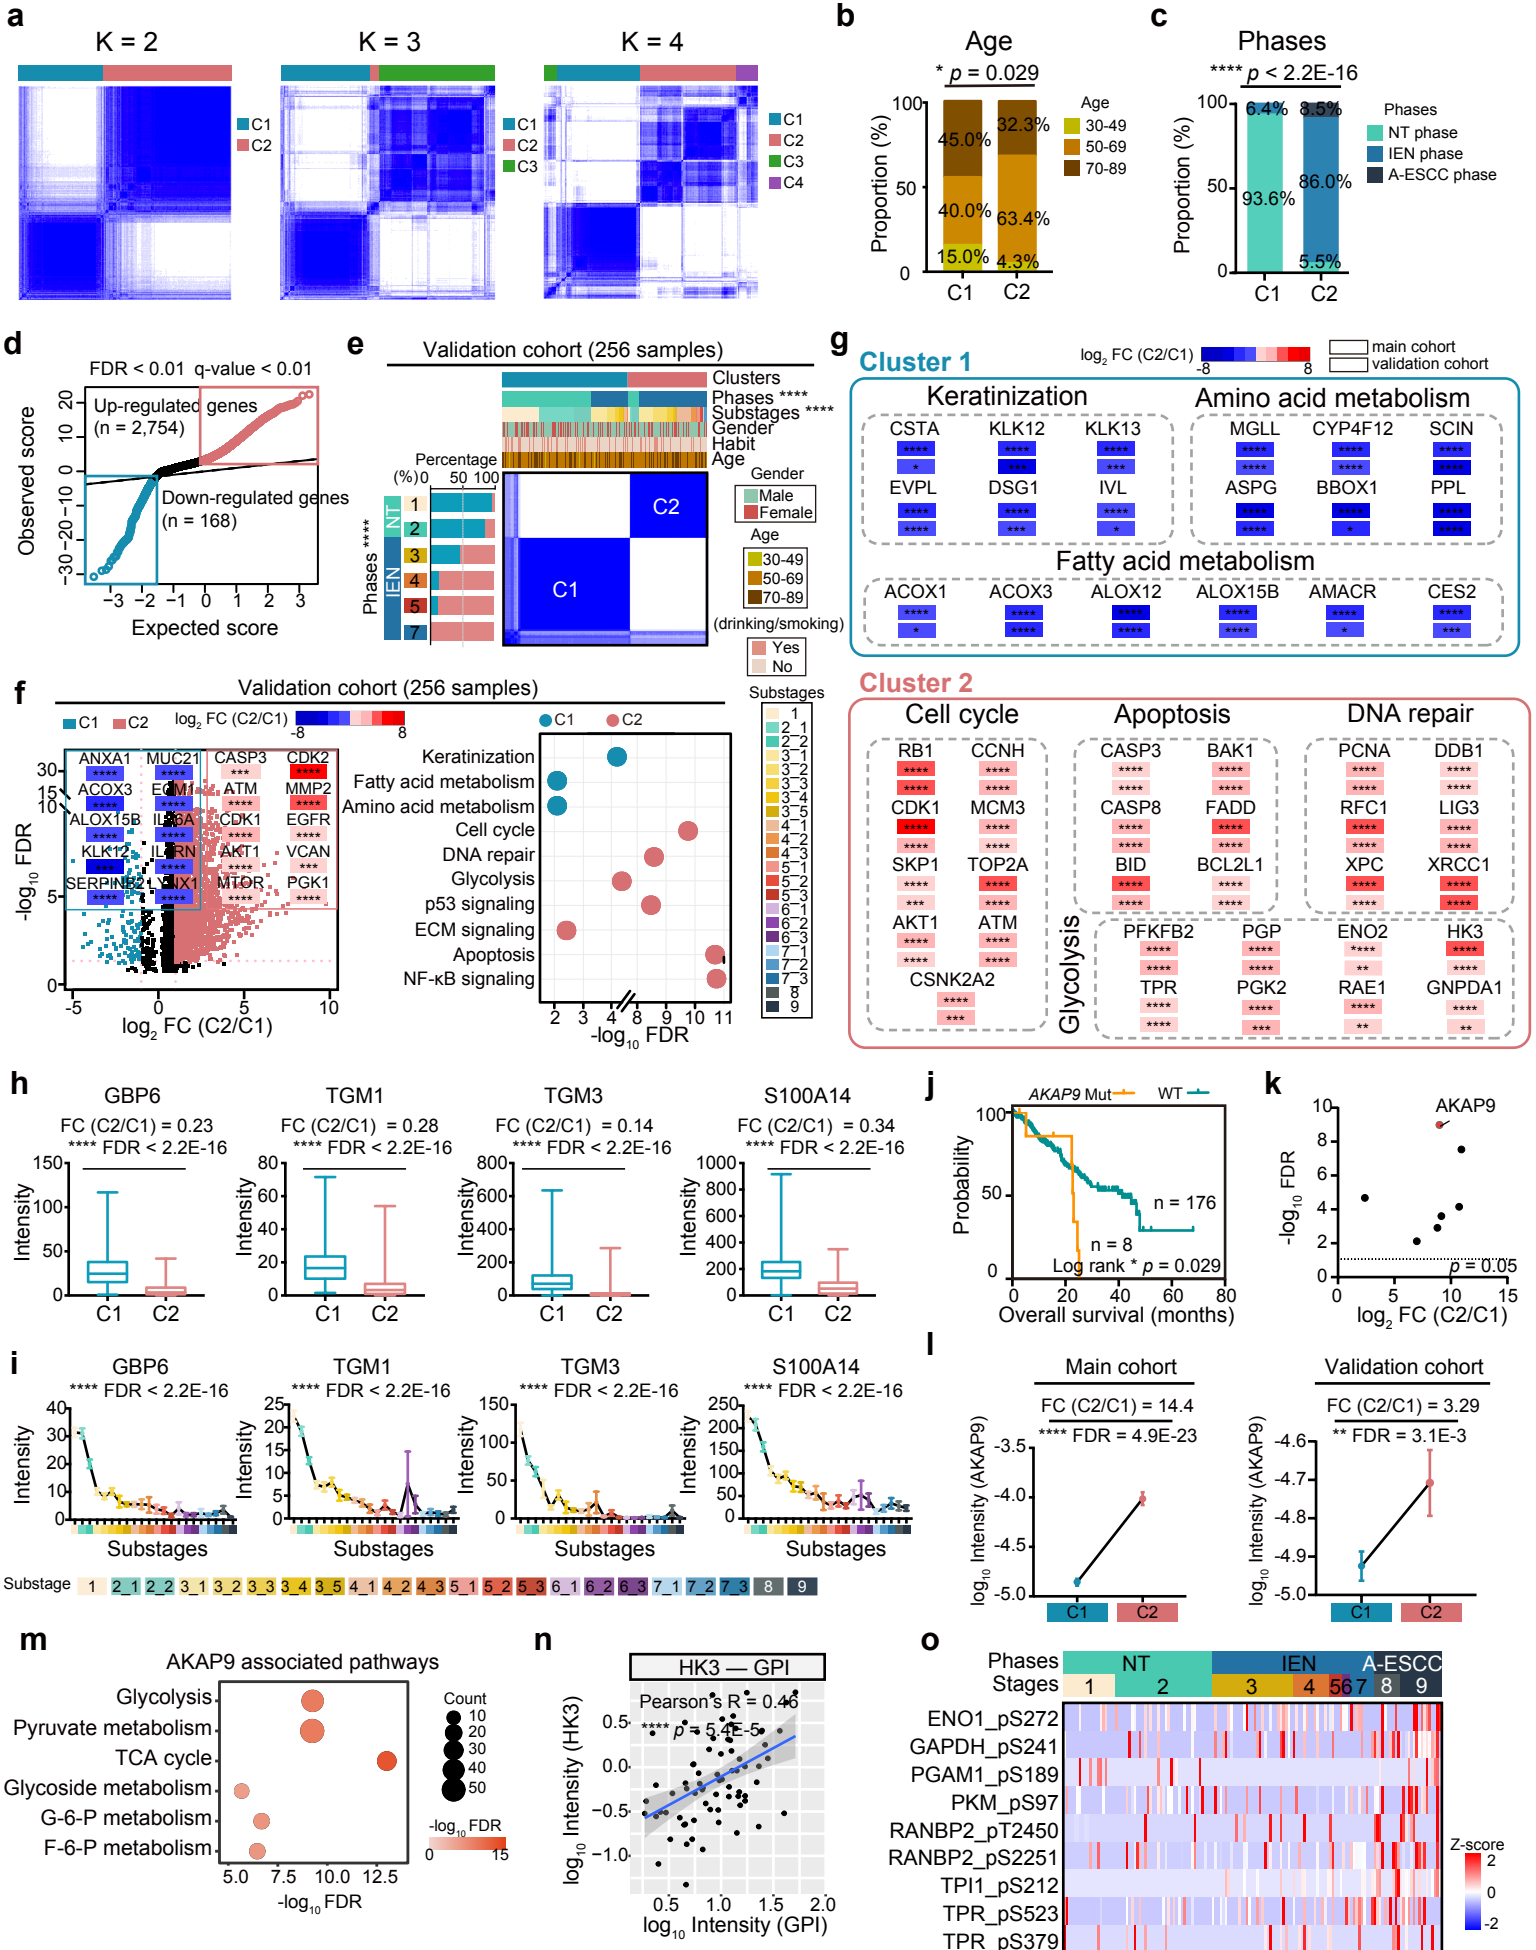

**Supplementary Fig. 6 Proteomic characteristics of two clusters and the impacts of *AKAP9* mutation.**

(a) Heatmap showing consensus matrix with  $\kappa = 2, 3,$  and 4. The input was the quantile-normalized iBAQ intensity (FOT) matrix of variable proteomics data ( $n = 6,885$ ). (b) Histogram showing the difference between the two clusters in different ages of ESCC patients (two-sided Fisher's exact test). (c) Histogram showing the proportion of the phases in the two clusters (two-sided Fisher's exact test, \*\*\*\*  $p < 2.2E-16$ ). (d) Scatterplot displaying the samfit of the filtered up-regulated genes (red) and down-regulated genes (green) of 786 sample in ESCC progression (two-sided Student's t-test, mean  $\pm$  SD). (e) Consensus clustering of 256 samples in the validation cohort (two-sided Fisher's exact test, \*\*\*\*  $p < 2.2E-16$  for phases and substages). (f) Volcano analysis of DEPs (left) and the represented biological pathways (right) in the two clusters in the validation cohort (two-sided Student's t-test, \*\*\*\*  $p < 1.0E-4$ ). Biological pathways are analyzed from the GO/KEGG database. (g) Genebox showing the DEPs and the representative pathways in the C1 (top) and C2 (bottom) in the main cohort and validation cohort (two-sided Student's t-test, \*  $p < 0.05$ ). (h) Boxplots showing the expression of specific molecules of esophageal tissue in the two clusters (two-sided Student's t-test, \*\*\*\*  $p < 2.2E-16$ ). Boxplots show median (central line), upper and lower quartiles (box limits), 1.5 $\times$  interquartile range (whiskers).  $n$  (C1) = 314,  $n$  (C2) = 472 biologically independent samples examined. (i) Column showing the expression of specific molecules of esophageal tissue in ESCC progression (Kruskal-Wallis test, mean  $\pm$  SEM, \*\*\*\*  $p < 2.2E-16$ ).  $n$  (stage 1) = 114,  $n$  (stage 2) = 206,  $n$  (stage 3) = 259,  $n$  (stage 4) = 86,  $n$  (stage 5) = 32,  $n$  (stage 6) = 17,  $n$  (stage 7) = 32,  $n$  (stage 8) = 16,  $n$  (stage 9) = 24 biologically independent samples examined. (j) Survival analysis of patients with *AKAP9* mutation versus WT comparison of ESCC (two-sided log-rank test). The survival information was referred the TCGA ESCC cohort. (k) Volcano analysis showing the impacts of the C2 significant mutations on their counterpart protein levels ( $n = 102$  for WES, two-sided Wilcoxon signed-rank test). (l) Column showing the expression of *AKAP9* in the two clusters in the main cohort (left) and validation cohort (right) (two-sided log-rank test, mean  $\pm$  SEM). Main cohort:  $n$  (C1) = 314,  $n$  (C2) = 472 biologically independent samples examined. Validation cohort:  $n$  (C1) = 158,  $n$  (C2) = 98 biologically independent samples examined. (m) Represented pathways enrichment of proteins which were positive correlated with *AKAP9* in the validation cohort ( $n = 256$ ). (n) Scatterplot showing the relationships between  $\log_{10}$  HK3 and  $\log_{10}$  GPI expression at the protein level (two-sided Pearson's correlation test). (o) Heatmap showing the phosphorylation of the phosphoproteins in the

dominant pathways regulated by *AKAP9* mutation in ESCC progression (Kruskal-Wallis test). The square directs to a subset of patient samples used for phosphoproteome (n = 145). \*\*\*\*  $p < 1.0E-4$ , \*\*\*  $p < 1.0E-3$ , \*\*  $p < 0.01$ , \*  $p < 0.05$ .



# Supplementary Fig. 7

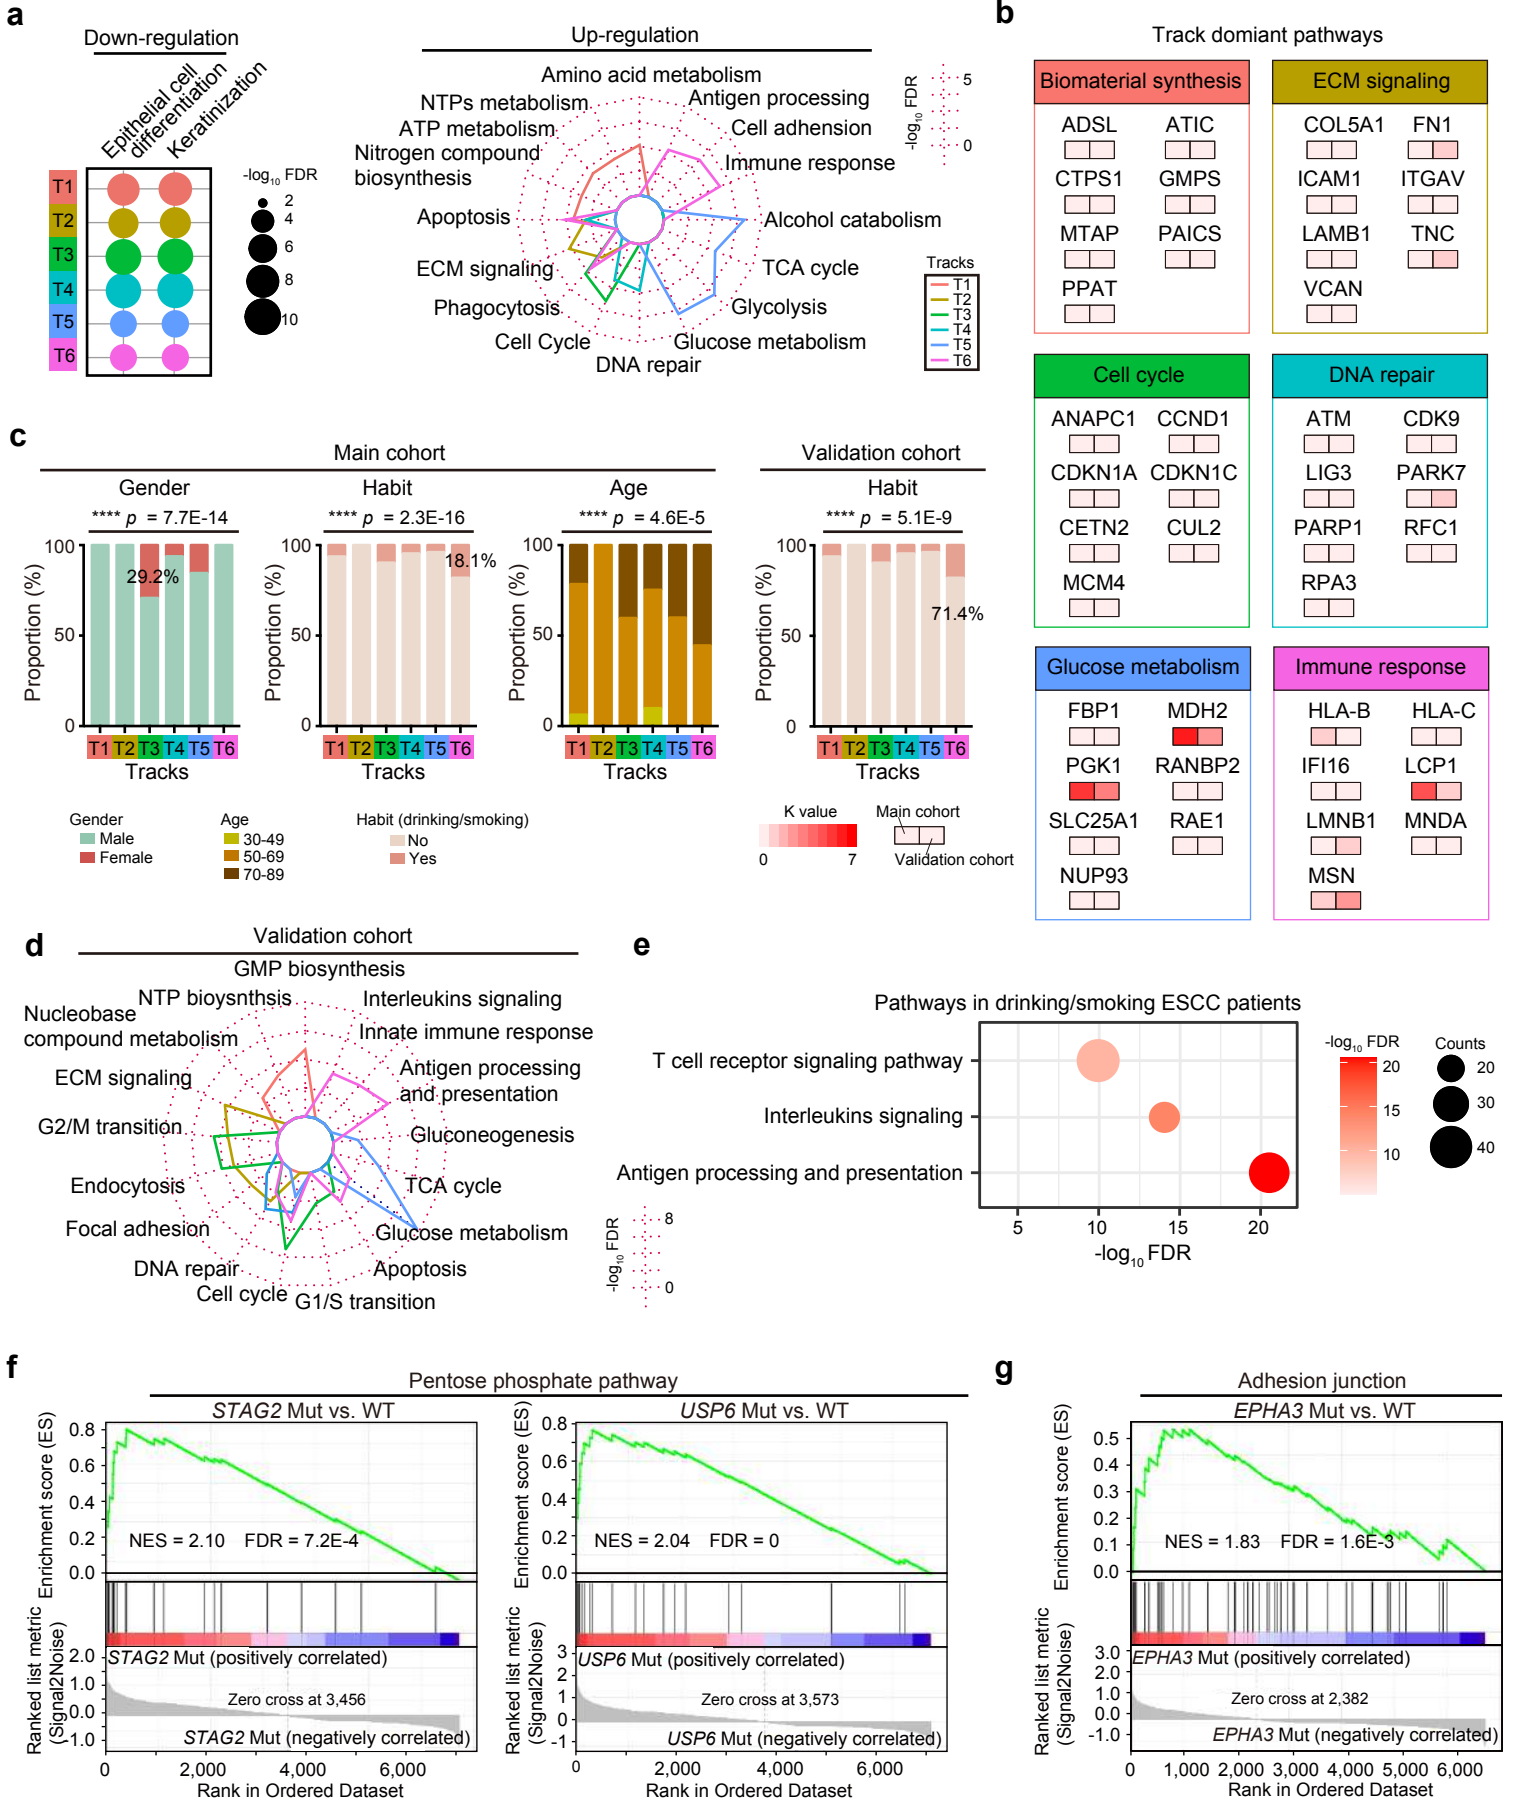

**Supplementary Fig. 7 The trajectory analysis of the early ESCC cohort.** (a) Radar analysis of the negative (left,  $K < 0$ ) and positive pathways (right,  $K > 0$ ) of the 6 tracks of the main cohort. (b) The represented proteins of the dominant pathways in the 6 major tracks of the main cohort ( $n = 746$ ) and the validation cohort ( $n = 256$ ). (c) Histograms depicting the proportion of different genders, drinking/smoking habits, and ages, in 6 tracks (two-sided Fisher's exact test). (d) Radar analysis of the tracks' dominant pathways in the validation cohort ( $n = 256$ ). (e) The dominant pathways in the ESCC patients with the habit of drinking/smoking. Biological pathways are analyzed from the GO/KEGG database. (f) GSEA plots (KEGG gene sets) for pentose phosphate pathway in *STAG2* mutation and WT comparison (left) and *USP6* mutation and WT comparison (right). (g) GSEA plot (KEGG gene sets) for pentose phosphate pathway in *EPHA3* mutation and WT comparison. \*\*\*\*  $p < 1.0E-4$ , \*\*\*  $p < 1.0E-3$ , \*\*  $p < 0.01$ , \*  $p < 0.05$ , ns.  $> 0.05$ . Source data are provided as a Source data file.

# Supplementary Fig. 8

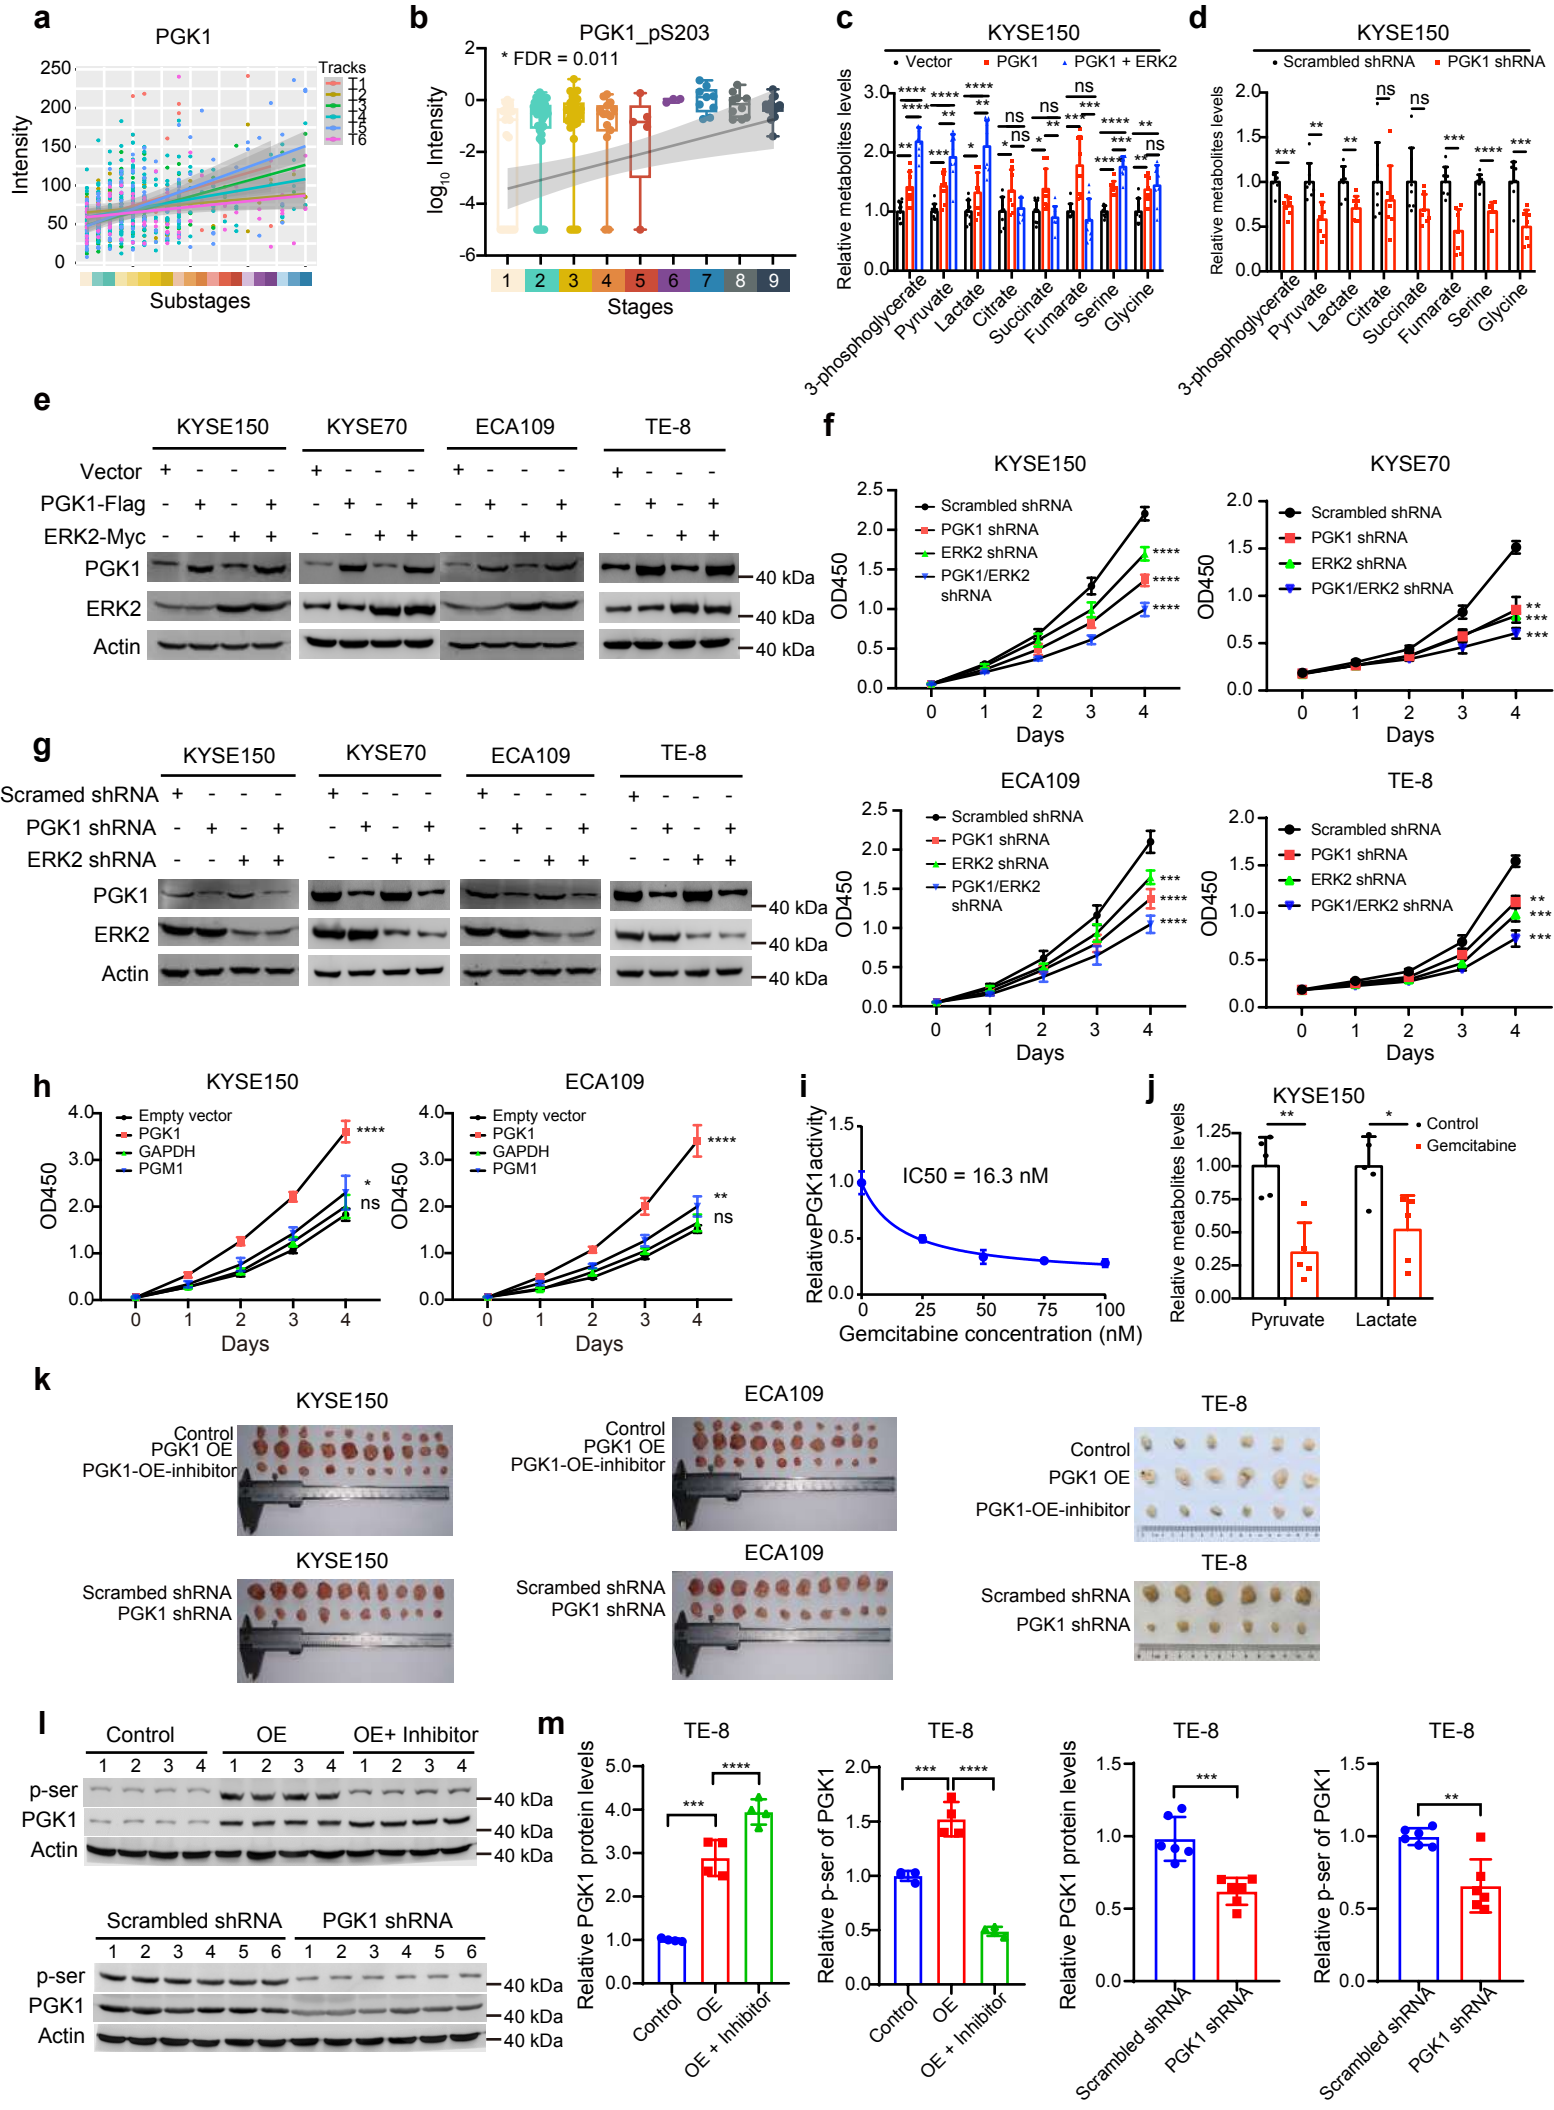

**Supplementary Fig. 8 The impacts of GAPDH-OE or PGM1-OE on ESCC cell proliferation and inhibiting PGK1 by gemcitabine attenuates cell proliferation. (a)** The expression of PGK1 in all 6 tracks. **(b)** Boxplot showing the expression of PGK1 S203 in the carcinogenesis progress of ESCC (Kruskal-Wallis test). Boxplot shows median (central line), upper and lower quartiles (box limits), 1.5× interquartile range (whiskers). A total of 145 samples were used for phosphoproteome. n (stage 1) = 20, n (stage 2) = 37, n (stage 3) = 31, n (stage 4) = 14, n (stage 5) = 5, n (stage 6) = 3, n (stage 7) = 9, n (stage 8) = 10, n (stage 9) = 16 biologically independent samples examined. **(c)** Metabolite levels in KYSE150 cells (n = 24) transfected with PGK1 or co-transfected with PGK1 and ERK2 (two-sided Student's t-test, mean ± SD). 3-phosphoglycerate: \*\*  $p = 2.0E-3$  (PGK1), \*\*\*\*  $p = 1.6E-8$  (PGK1 + ERK2), \*\*\*\*  $p = 2.7E-5$  (ERK2 & (PGK1 + ERK2)). Pyruvate: \*\*\*  $p = 7.1E-4$  (PGK1), \*\*\*\*  $p = 1.7E-5$  (PGK1 + ERK2), \*\*  $p = 9.0E-3$  (ERK2 & (PGK1 + ERK2)). Lactate: \*  $p = 0.037$  (PGK1), \*\*\*\*  $p = 1.5E-5$  (PGK1 + ERK2), \*\*  $p = 1.4E-3$  (ERK2 & (PGK1 + ERK2)). Citrate: \*  $p = 0.038$  (PGK1),  $p = 0.63$  (PGK1 + ERK2),  $p = 0.055$  (ERK2 & (PGK1 + ERK2)). Succinate: \*  $p = 0.015$  (PGK1),  $p = 0.30$  (PGK1 + ERK2), \*\*  $p = 3.5E-3$  (ERK2 & (PGK1 + ERK2)). Fumarate: \*\*\*  $p = 7.5E-4$  (PGK1),  $p = 0.30$  (PGK1 + ERK2), \*\*\*  $p = 8.0E-4$  (ERK2 & (PGK1 + ERK2)). Serine: \*\*\*\*  $p = 2.3E-6$  (PGK1), \*\*\*\*  $p = 5.3E-8$  (PGK1 + ERK2), \*\*\*  $p = 3.2E-4$  (ERK2 & (PGK1 + ERK2)). Glycine: \*\*  $p = 4.8E-3$  (PGK1), \*\*  $p = 8.9E-3$  (PGK1 + ERK2),  $p = 0.64$  (ERK2 & (PGK1 + ERK2)). **(d)** Metabolite levels in PGK1-knockdown KYSE150 cells and control cells (two-sided Student's t-test, mean ± SD). Fourteen cell samples are used in the analysis. \*\*\*  $p = 3.9E-4$ , \*\*  $p = 2.1E-3$ , \*\*  $p = 4.2E-3$ ,  $p = 0.37$ ,  $p = 0.07$ , \*\*\*  $p = 3.6E-4$ , \*\*\*\*  $p = 2.5E-5$ , \*\*\*  $p = 6.8E-4$  from left to right. **(e)** Western blot showing the impacts of PGK1-OE and ERK2-OE on the abundance of their counterpart proteins in the ESCC cells. **(f)** Cell proliferation with PGK1 knockdown and/or ERK2 knockdown in KYSE150 cells, KYSE70 cells, ECA109 cells, and TE-8 cell (two-sided Student's t-test, mean ± SD). A total of 320 cell samples are used in the analysis. KYSE150: \*\*\*\*  $p = 1.5E-7$  (PGK1 shRNA), \*\*\*\*  $p = 1.2E-5$  (ERK2 shRNA), \*\*\*\*  $p = 1.4E-8$  (PGK1/ERK2 shRNA). KYSE70: \*\*  $p = 1.6E-3$  (PGK1 shRNA), \*\*\*\*  $p = 6.4E-5$  (ERK2 shRNA), \*\*\*\*  $p = 5.3E-5$  (PGK1/ERK2 shRNA). ECA109: \*\*\*\*  $p = 2.4E-5$  (PGK1 shRNA), \*\*\*\*  $p = 2.8E-4$  (ERK2 shRNA), \*\*\*\*  $p = 1.0E-6$  (PGK1/ERK2 shRNA). TE-8: \*\*  $p = 1.0E-3$  (PGK1 shRNA), \*\*\*  $p = 4.7E-4$  (ERK2 shRNA), \*\*\*  $p = 1.7E-4$  (PGK1/ERK2 shRNA). **(g)** Western blot showing the impacts of PGK1 knockdown and/or ERK2 knockdown on the abundance of their counterpart proteins. **(h)** The impacts of

GAPDH-OE or PGM1-OE on cell proliferation in KYSE150 cells (left) and ECA109 cells (right) (two-sided Student's t-test, mean  $\pm$  SD). PGK1-OE in KYSE150 cells (left) and ECA109 cells (right) is the positive control. A total of 200 cell samples are used in the analysis. KYSE150: \*\*\*\*  $p = 3.7E-7$  (PGK1),  $p = 0.19$  (GAPDH), \*  $p = 0.026$  (PGM1). ECA109: \*\*\*\*  $p = 1.9E-6$  (PGK1),  $p = 0.17$  (GAPDH), \*\*  $p = 1.6E-3$  (PGM1). **(i)** *In vitro* assay showing the effects of gemcitabine on inhibition of PGK1 activity (IC50: 16.3 nM, mean  $\pm$  SD). IC50, half-maximal inhibitory concentration. Bars represent the mean of  $n = 3$  independent experiments with error bars indicating SD. **(j)** Gemcitabine decreased PGK1 mediated metabolic flux (two-sided Student's t-test, mean  $\pm$  SD). Twenty cell samples are used in the analysis. \*\*  $p = 1.6E-3$  (Pyruvate), \*  $p = 0.014$  (Lactate). **(k)** The impacts of PGK1-OE (top) and PGK1 knockdown (bottom) on the size of the xenografts in the KYSE150 cells, ECA109 cells, and TE-8 cells. **(l)** Western blot showing the abundance of PGK1 in the excised tumors at the protein and phosphoprotein levels ( $n = 3$  independent experiments). **(m)** The column showing the impacts of PGK1 on the abundance of PGK1 at the protein and phosphoprotein levels in TE-8 cells ( $n = 48$ , two-sided Student's t-test, mean  $\pm$  SD). \*\*\*  $p = 1.0E-4$ , \*\*\*\*  $p = 1.0E-6$ , \*\*\*  $p = 7.1E-4$ , \*\*\*\*  $p = 1.5E-5$ , \*\*\*  $p = 5.3E-4$ , \*\*  $p = 1.5E-3$  from left to right. \*\*\*\*  $p < 1.0E-4$ , \*\*\*  $p < 1.0E-3$ , \*\*  $p < 0.01$ , \*  $p < 0.05$ , ns.  $> 0.05$ . Source data are provided as a Source data file.

# Supplementary Fig. 9

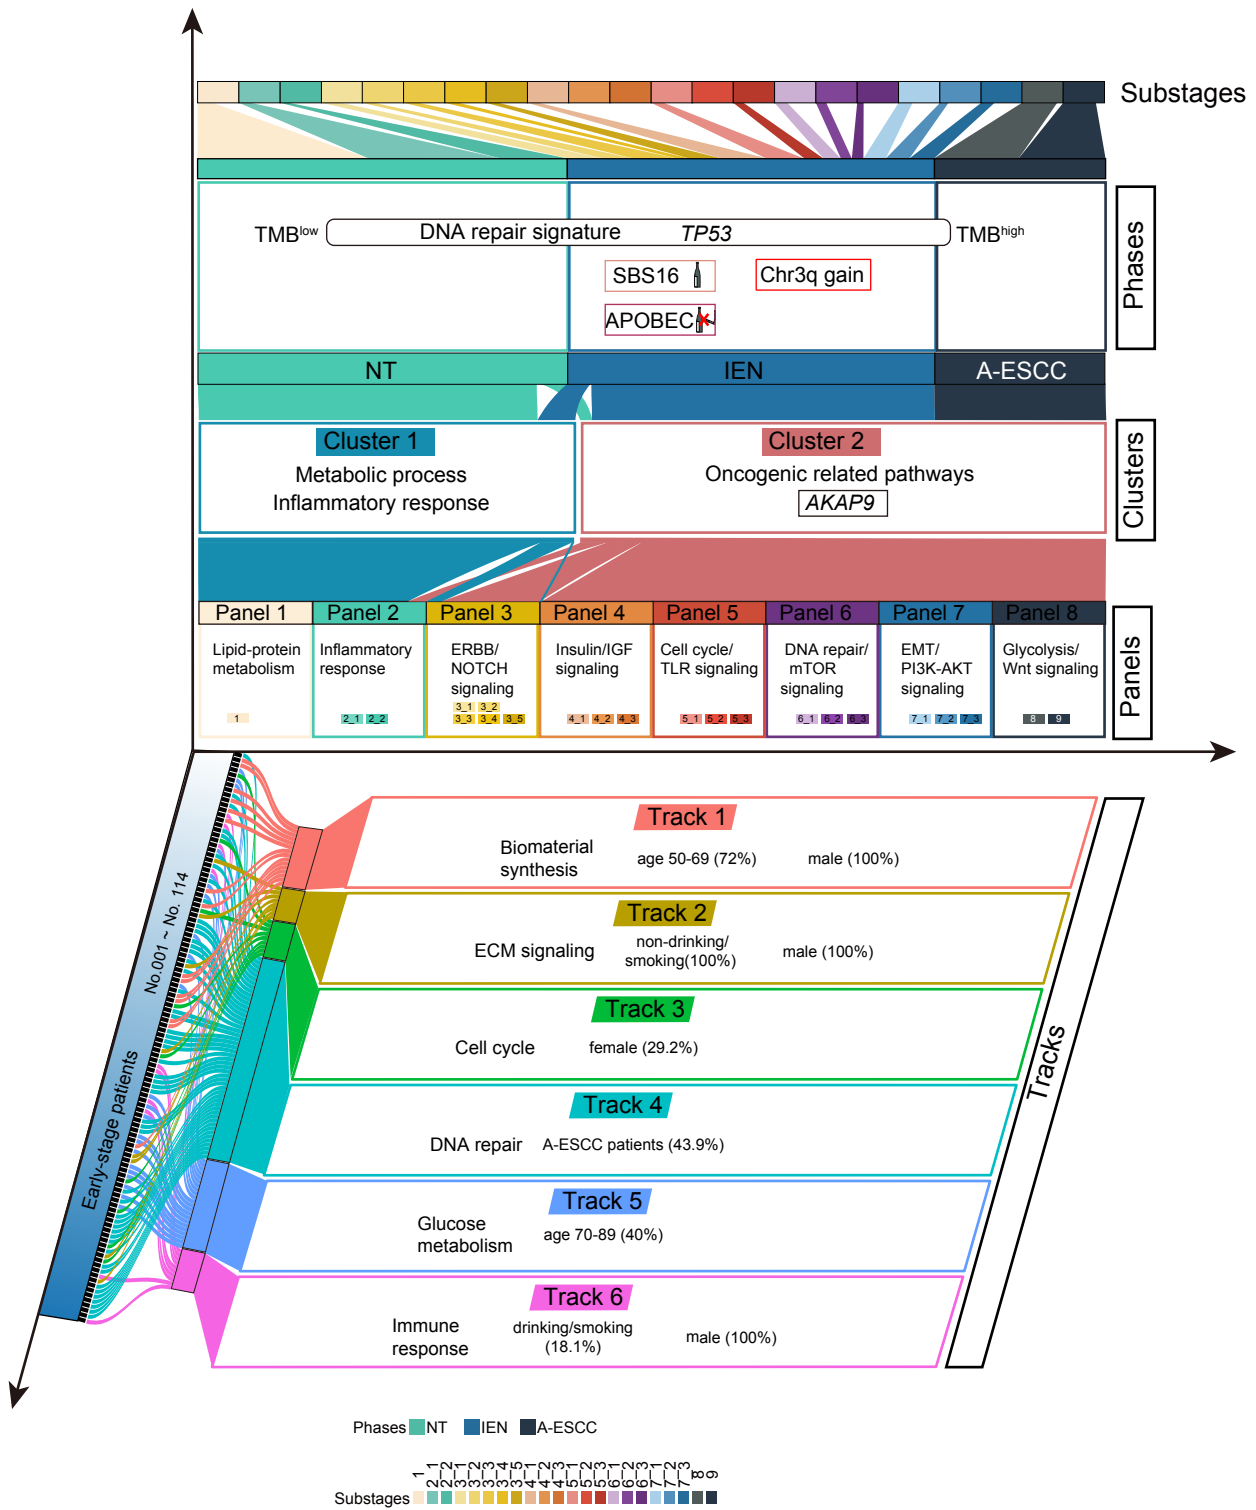



**Supplementary Fig. 9** A brief summary of the characteristics of ESCC. TMB: tumor mutation burden.

**Supplementary Table 1 | Clinical characteristics of Fudan early-stage ESCC cohort (n = 154).**

| Characteristics          | n (%)      |
|--------------------------|------------|
| Age                      |            |
| < 50 yr                  | 12 (7.8)   |
| 50~70 yr                 | 102 (66.2) |
| > 70 yr                  | 40 (26.0)  |
| Gender                   |            |
| Male                     | 140 (90.9) |
| Female                   | 14 (9.1)   |
| Habit (Drinking/smoking) |            |
| Yes                      | 19 (12.3)  |
| No                       | 135 (8.7)  |
| TNM stage                |            |
| T1 stage                 | 114 (74.0) |
| T2 stage                 | 16 (10.4)  |
| T3 stage                 | 24 (15.6)  |
| Survival status          |            |
| Alive                    | 154 (100)  |
| Death                    | 0 (0)      |

**Supplementary Table 2 | Subclassification information and samples number in the Fudan cohort.**

| <b>Stages</b>                         | <b>Substages (sample number)</b>                                        |
|---------------------------------------|-------------------------------------------------------------------------|
| Stage 1 (Normal epithelial tissue)    | 1 (n = 114)                                                             |
| Stage 2 (Dysplasia stage)             | 2_1 (n = 114), 2_2 (n = 92)                                             |
| Stage 3 (Tis stage)                   | 3_1 (n = 61), 3_2 (n = 73), 3_3 (n = 67), 3_4 (n = 19),<br>3_5 (n = 39) |
| Stage 4 (Lamina propria cancer stage) | 4_1 (n = 61), 4_2 (n = 18), 4_3 (n = 7)                                 |
| Stage 5 (Muscularis mucosa stage)     | 5_1 (n = 14), 5_2 (n = 9), 5_3 (n = 9)                                  |
| Stage 6 (Sm stage a)                  | 6_1 (n = 5), 6_2 (n = 5), 6_3 (n = 7)                                   |
| Stage 7 (Sm stage b)                  | 7_1 (n = 12), 7_2 (n = 9), 7_3 (n = 11)                                 |
| Stage 8 (T2 stage)                    | 8 (n = 16)                                                              |
| Stage 9 (T3 stage)                    | 9 (n = 24)                                                              |

**Supplementary Table 3 | Subclassification information and samples number of the validation cohort.**

| <b>Stages</b>                         | <b>Substages (sample number)</b>                                      |
|---------------------------------------|-----------------------------------------------------------------------|
| Stage 1 (Normal epithelial tissue)    | 1 (n = 49)                                                            |
| Stage 2 (Dysplasia stage)             | 2_1 (n = 45), 2_2 (n = 30)                                            |
| Stage 3 (Tis stage)                   | 3_1 (n = 38), 3_2 (n = 27), 3_3 (n = 13), 3_4 (n = 7),<br>3_5 (n = 5) |
| Stage 4 (Lamina propria cancer stage) | 4_1 (n = 20), 4_2 (n = 8), 4_3 (n = 1)                                |
| Stage 5 (Muscularis mucosa stage)     | 5_1 (n = 3), 5_2 (n = 3), 5_3 (n = 2)                                 |
| Stage 6 (Sm stage a)                  | NA                                                                    |
| Stage 7 (Sm stage b)                  | 7_1 (n = 1), 7_2 (n = 4)                                              |

**Supplementary Table 4 | Subclassification information and sample number of the Fudan cohort for phosphoproteome.**

| Stages                                | Substages (sample number)                                           |
|---------------------------------------|---------------------------------------------------------------------|
| Stage 1 (Normal epithelial tissue)    | 1 (n = 20)                                                          |
| Stage 2 (Dysplasia stage)             | 2_1 (n = 26), 2_2 (n = 11)                                          |
| Stage 3 (Tis stage)                   | 3_1 (n = 4), 3_2 (n = 11), 3_3 (n = 9), 3_4 (n = 2), 3_5<br>(n = 5) |
| Stage 4 (Lamina propria cancer stage) | 4_1 (n = 9), 4_2 (n = 5)                                            |
| Stage 5 (Muscularis mucosa stage)     | 5_2 (n = 1), 5_2 (n = 1), 5_3 (n = 3)                               |
| Stage 6 (Sm stage a)                  | 6_2 (n = 1), 6_3 (n = 2)                                            |
| Stage 7 (Sm stage b)                  | 7_1 (n = 3), 7_2 (n = 3), 7_3 (n = 3)                               |
| Stage 8 (T2 stage)                    | 8 (n = 10)                                                          |
| Stage 9 (T3 stage)                    | 9 (n = 16)                                                          |
